# Supplementary material for: The Potential for Effect of a Six-Week Training Program for Gait Aid Use in Older People with Dementia with Unsteadiness of Gait: A Pilot Study
Source: J Clin Med. 2023 Feb 16;12(4):1574. doi: 10.3390/jcm12041574 (PMC9967216; doi:10.3390/jcm12041574)
Supplement: Supplementary file 1 [file jcm-12-01574-s001.zip]

Archive with 6 entries (6 files):
- Supplemenary Material S2. Gait_aid-training_for_people_with_dementia--2nd_week_second_home_visit.pdf
- Supplementary Material S1. Gait_aid-training_for_people_with_dementia--Baseline_first_home_visit.pdf
- Supplementary Material S3. Gait_aid-training_for_people_with_dementia--3rd_week_third_home_visit.pdf
- Supplementary Material S4.Gait_aid-training_for_people_with_dementia--6th_week_fourth_home_visit.pdf
- Supplementary Material S5.Gait_aid-training_for_people_with_dementia--6_weeks_follow-up_post_program.pdf
- Supplementary Material S6. Physio manual and protocol.pdf
